# Supplementary material for: Reduction in Hypoglycemia With the Predictive Low-Glucose Management System: A Long-term Randomized Controlled Trial in Adolescents With Type 1 Diabetes
Source: Oxford University Press journal article supplement (doi:10.2337/dc17-1604), 2017-11-30
Supplement: dc171604supplementarydata.pdf [file dc171604supplementarydata.pdf]

## SUPPLEMENTARY DATA

**Supplementary Figure 1.** demonstrates the time in hypoglycemia (SG <3.5mmol/l, <3mmol/l) both during day and night. SAPT: sensor-augmented pump therapy; PLGM: predictive low glucose management system

a: change from baseline;  $p < 0.005$

b: difference between groups;  $p < 0.005$

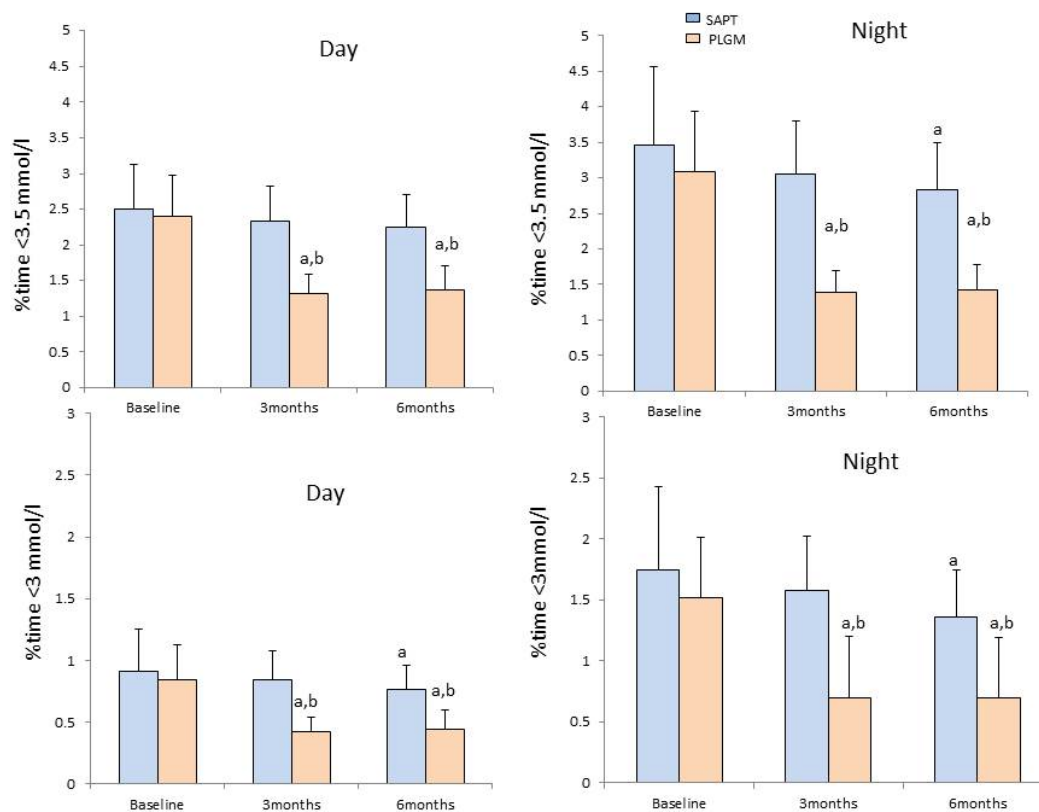

## SUPPLEMENTARY DATA

### **PLGM group:**

- 1) *Institute of Endocrinology and Diabetes, The Children's Hospital at Westmead, The University of Sydney, Sydney, Australia.*  
Julie Klimek, Kristine Heels, Tracey Jopling, Dr Geoffrey Ambler
- 2) *Department of Endocrinology and Diabetes, Royal Children's Hospital, Melbourne, Australia*  
Rebecca Gebert, Miles Clarkson Fletcher, Prof Fergus Cameron
- 3) *Department of Endocrinology and Diabetes, John Hunter Children's Hospital, Newcastle, Australia.*  
Tenele Smith, Amy Crawford, Jordan Rafferty, A/Prof Bruce King
- 4) *Department of Endocrinology and Diabetes, Women's and Children's Hospital, Adelaide, Australia.*  
Tania Kelly, Stephanie Oates, Dr Janice Fairchild
- 5) *Telethon Kids Institute and Princess Margaret Hospital, Perth, Australia*  
Dr Mary B Abraham, Dr Charles Czank, Jennifer Nicholas, Carol Cole, Leah  
Laurenson, Heather Roby, Grant Smith, Prof Elizabeth Davis, Prof Timothy W Jones
